# Supplementary material
Source: MDPI journal article supplement (https://www.mdpi.com/1424-8247/16/7/984)

## Supplementary Materials

# Toward symmetric thioamides: Microwave-aided synthesis of terephthalic acid derivatives

Andrzej Bak <sup>1,\*</sup>, Violetta Kozik <sup>1,\*</sup>, Aleksandra Swietlicka <sup>1</sup>, Wojciech Baran <sup>2</sup>, Adam Smolinski <sup>3</sup> and Andrzej Zieba <sup>4</sup>

<sup>1</sup> Institute of Chemistry, University of Silesia, Szkolna 9, 40-006 Katowice, Poland; aswietlicka@us.edu.pl

<sup>2</sup> Department of General and Analytical Chemistry, Faculty of Pharmaceutical Sciences in Sosnowiec, Medical University of Silesia in Katowice, Jagiellońska 4, 41-200 Sosnowiec, Poland; wbaran@sum.edu.pl

<sup>3</sup> Central Mining Institute, Plac Gwarków 1, 40-166 Katowice, Poland; smolin@gig.katowice.pl

<sup>4</sup> Department of Organic Chemistry, Faculty of Pharmaceutical Sciences in Sosnowiec, Medical University of Silesia in Katowice, Jagiellońska 4, 41-200 Sosnowiec, Poland; zieba@sum.edu.pl

\* Correspondence: andrzej.bak@us.edu.pl (A.B.); violetta.kozik@us.edu.pl (V.K.); Tel.: +48-32-359-11-97 (A.B.)

**Figure S1.**  $^1\text{H}$  NMR and  $^{13}\text{C}$  NMR spectra of compound **4c**.

$^1\text{H}$  NMR

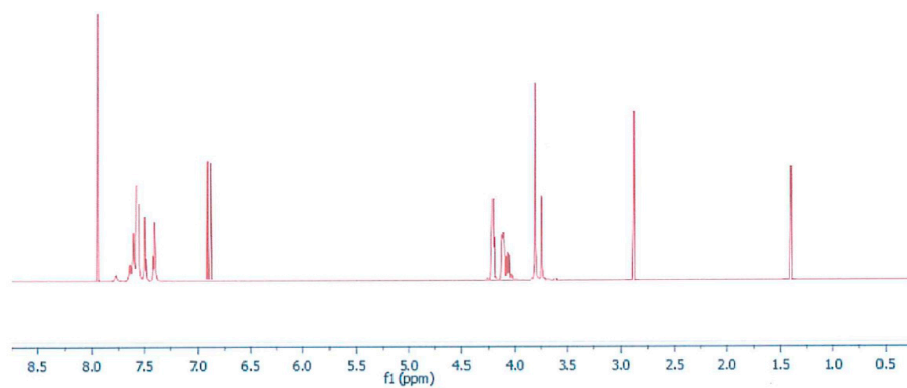

$^{13}\text{C}$  NMR

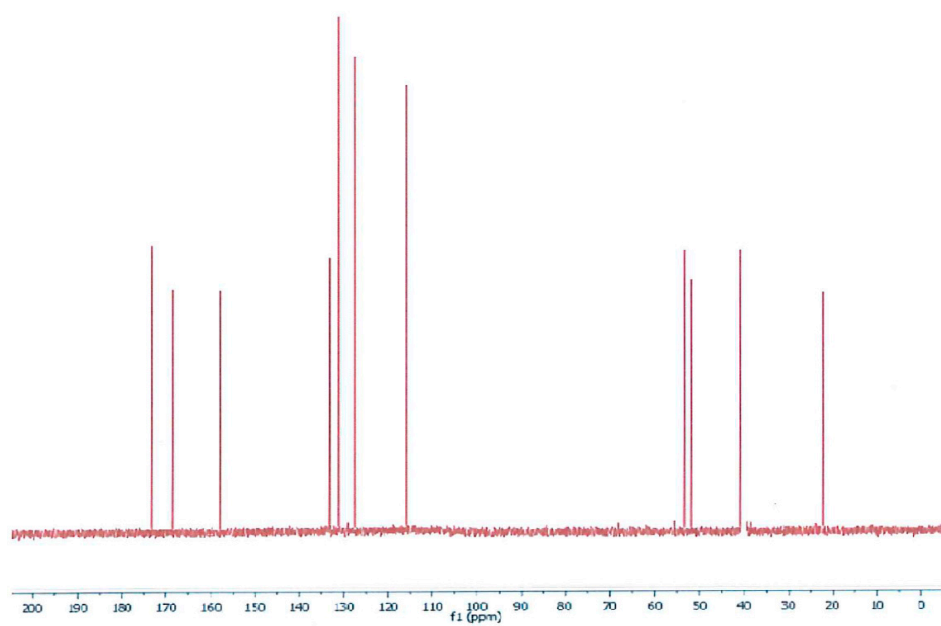

**Figure S2.**  $^1\text{H}$  NMR and  $^{13}\text{C}$  NMR spectra of compound **4d**.

$^1\text{H}$  NMR

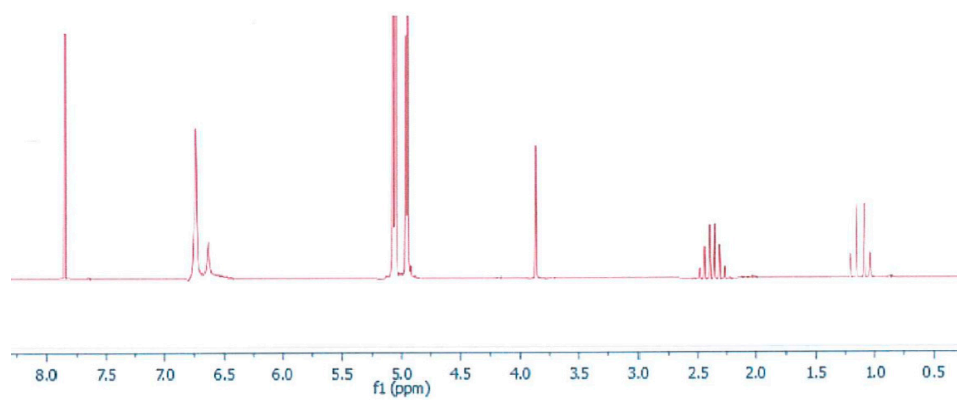

$^{13}\text{C}$  NMR

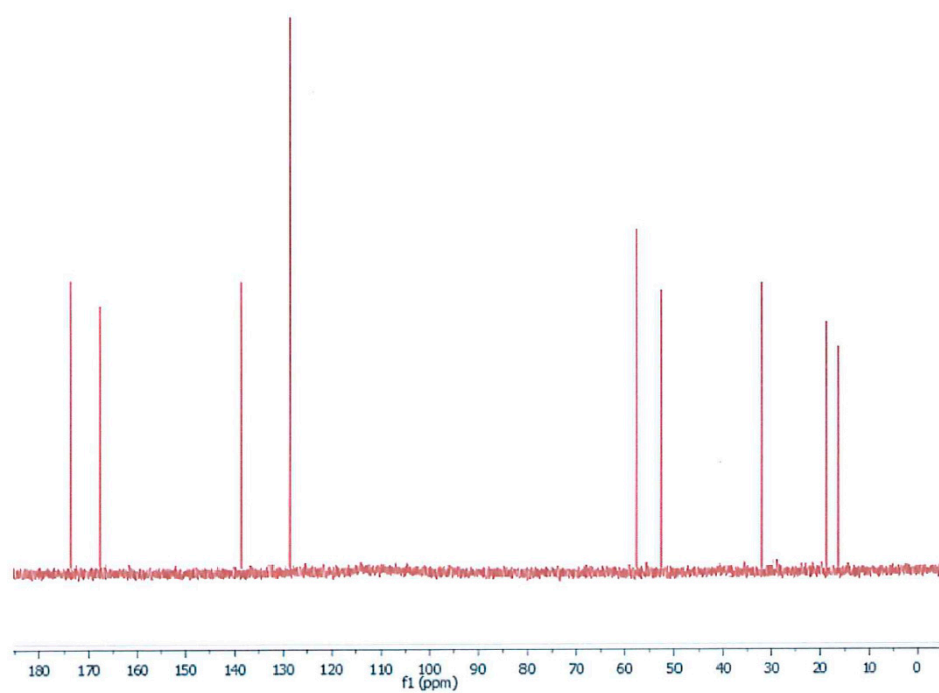

**Figure S3.**  $^1\text{H}$  NMR and  $^{13}\text{C}$  NMR spectra of compound **4e**.

$^1\text{H}$  NMR

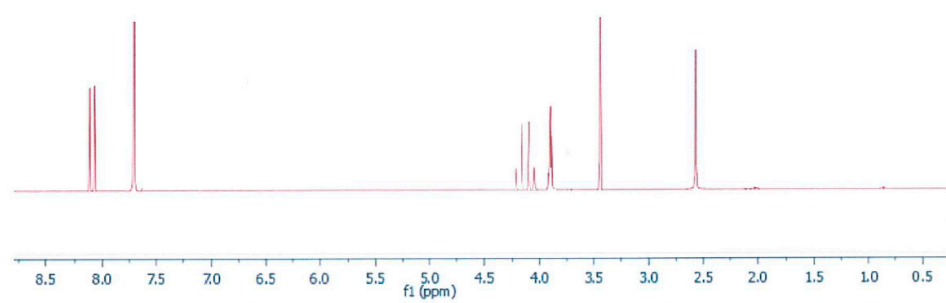

$^{13}\text{C}$  NMR

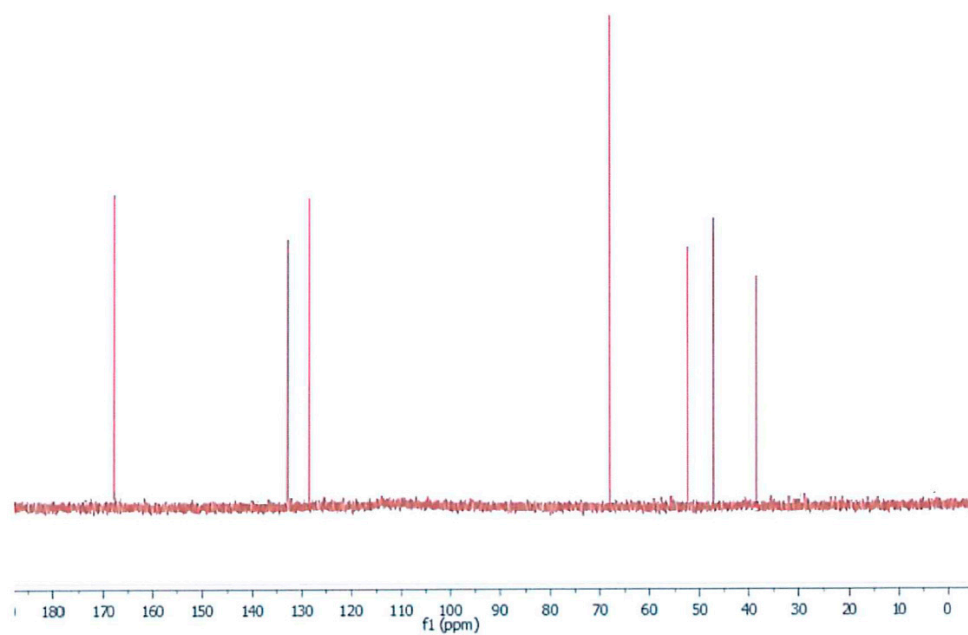

**Figure S4.**  $^1\text{H}$  NMR and  $^{13}\text{C}$  NMR spectra of compound **5a**.

$^1\text{H}$  NMR

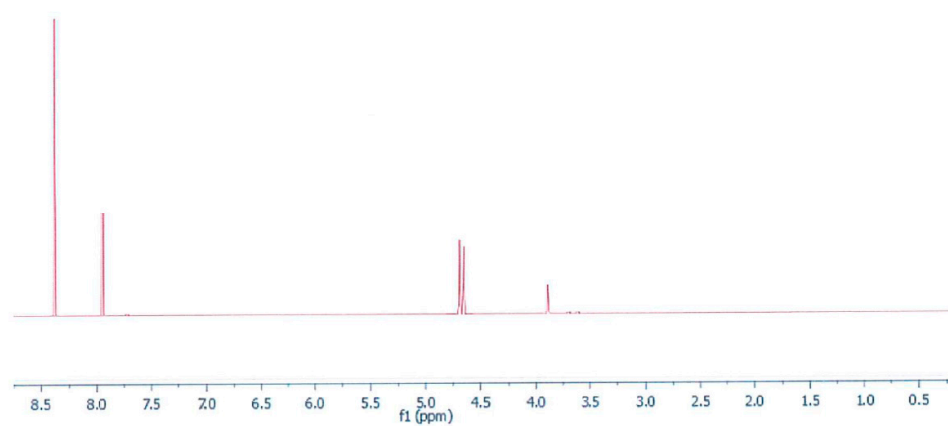

$^{13}\text{C}$  NMR

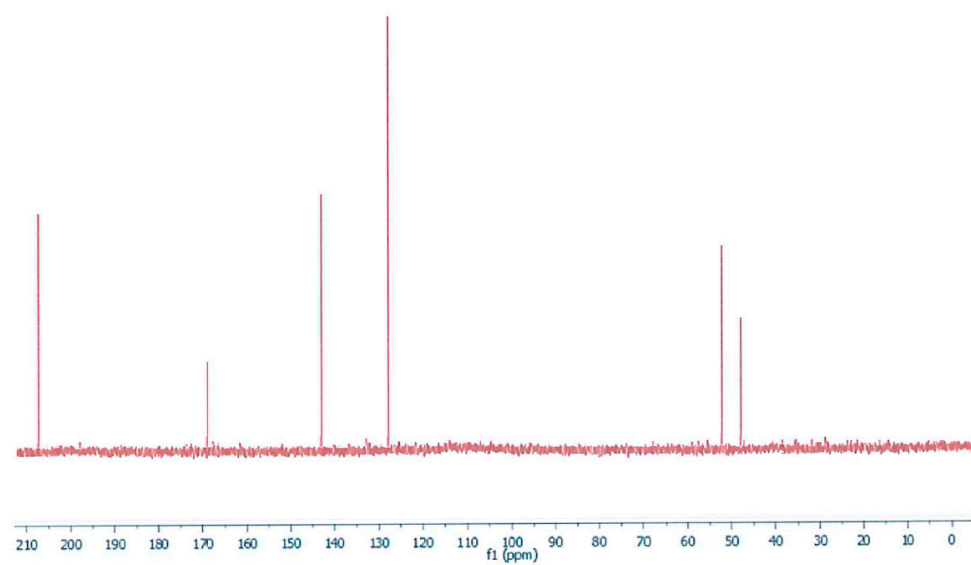

**Figure S5.**  $^1\text{H}$  NMR and  $^{13}\text{C}$  NMR spectra of compound **5b**.

$^1\text{H}$  NMR

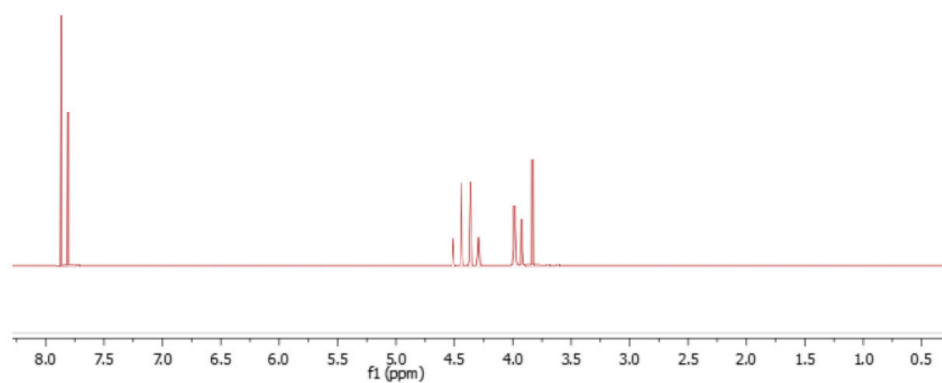

$^{13}\text{C}$  NMR

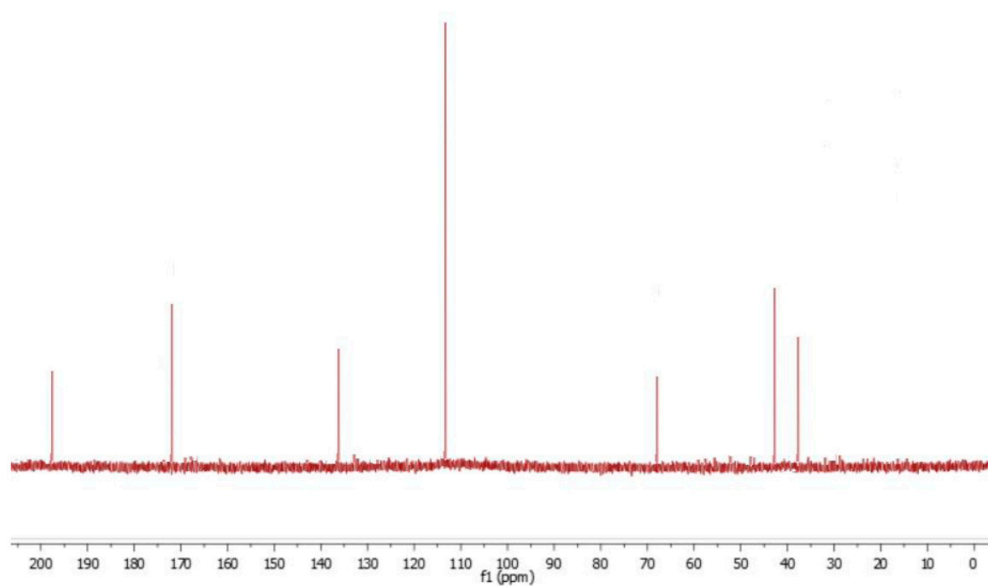

**Figure S6.**  $^1\text{H}$  NMR and  $^{13}\text{C}$  NMR spectra of compound **5c**.

$^1\text{H}$  NMR

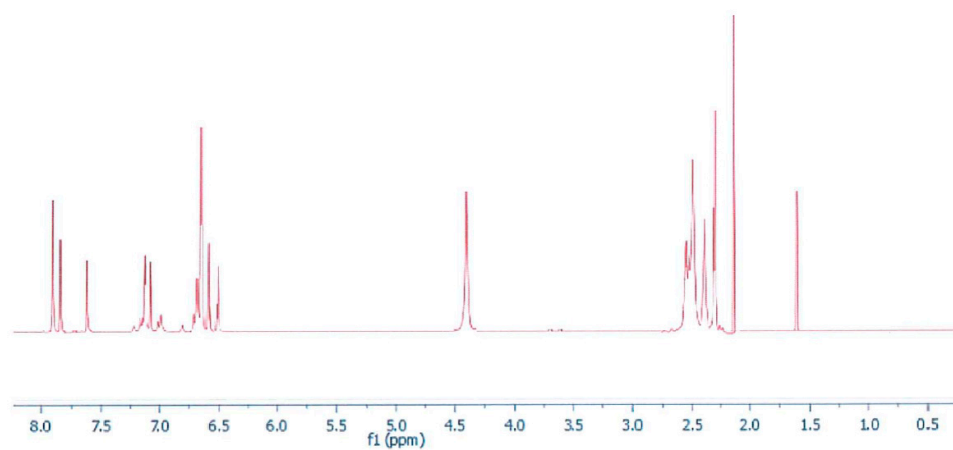

$^{13}\text{C}$  NMR

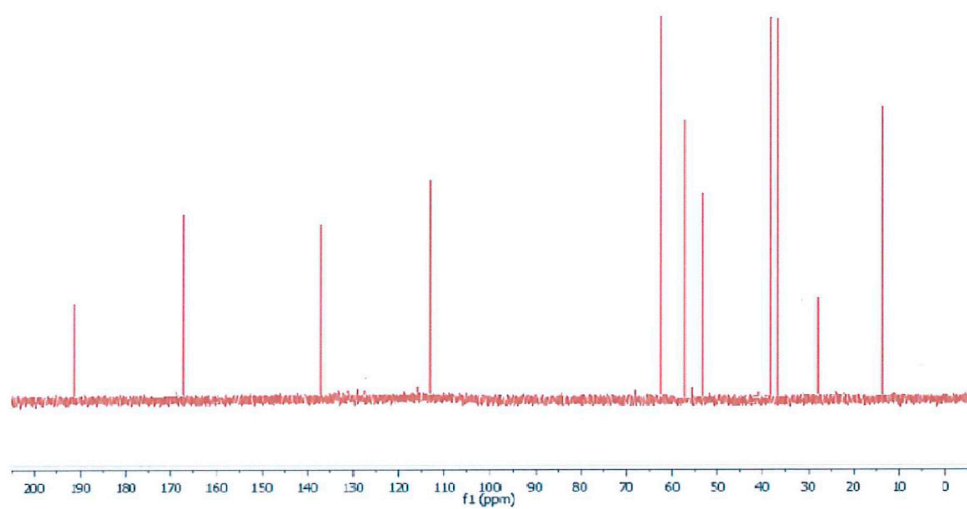

**Figure S7.**  $^1\text{H}$  NMR and  $^{13}\text{C}$  NMR spectra of compound **5d**.

$^1\text{H}$  NMR

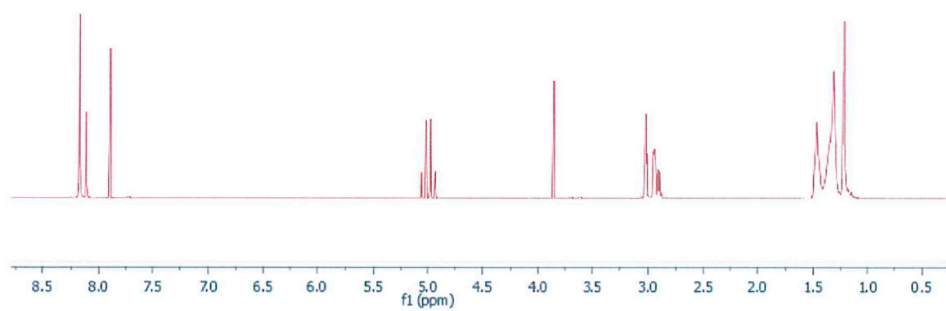

$^{13}\text{C}$  NMR

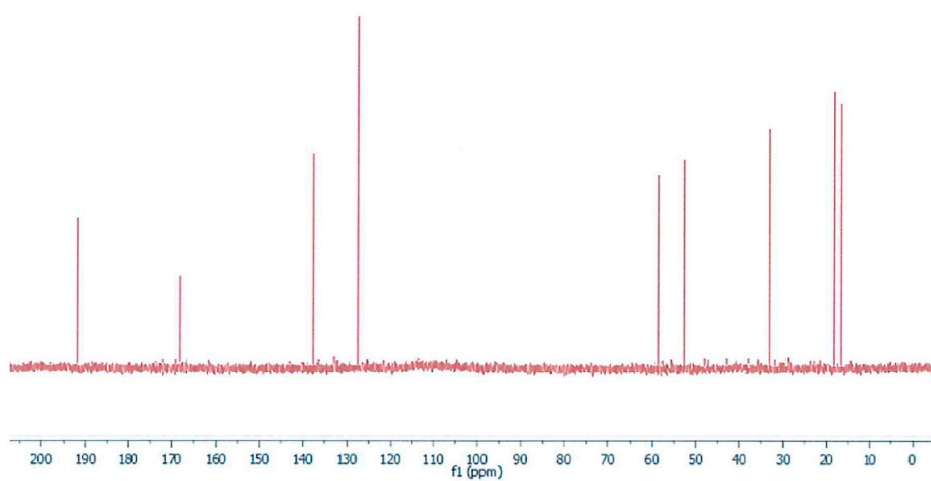



**Figure S8.**  $^1\text{H}$  NMR and  $^{13}\text{C}$  NMR spectra of compound **5e**.

$^1\text{H}$  NMR

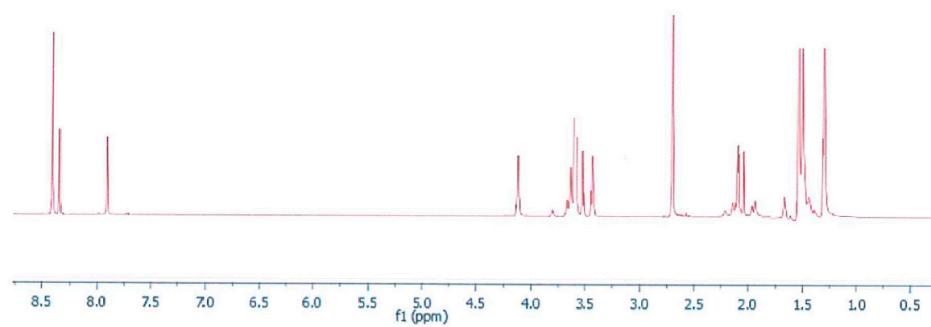

$^{13}\text{C}$  NMR

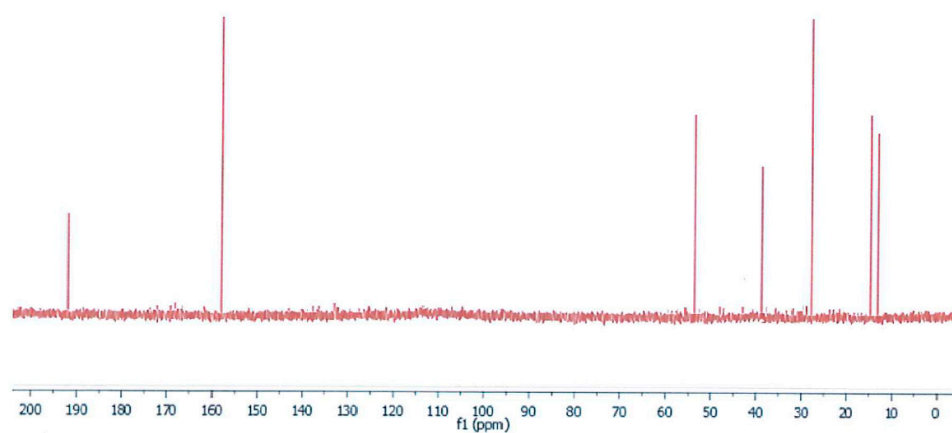

Supplement: s1 [file s1]
